# Supplementary material for: Decoding an Amino Acid Sequence to Extract Information on Protein Folding
Source: MDPI journal article supplement (doi:10.3390/molecules27093020), 2022-05-07
Supplement: s1 [file s1]

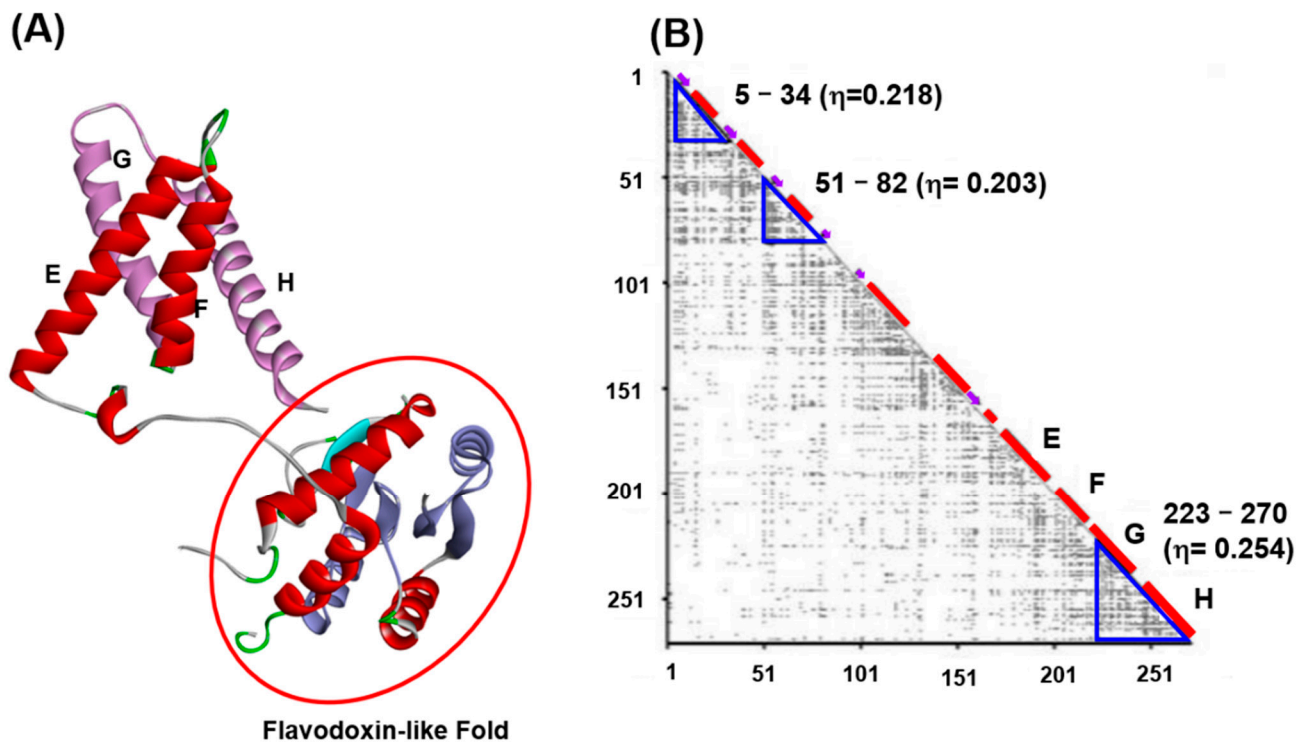

**Figure S1.** (A) A 3D structure and (B) ADM for the circadian clock protein KaiA (PDB code: 1R8J). The G and H helix part is purple in color. The flavodoxin domain is enclosed by a red circle. A Rossmann fold is blue in color in (A). The ADM predicted regions are enclosed by blue triangles in (B). The segment of a predicted region is labeled near the diagonal of the map. The location of an  $\alpha$ -helix is denoted by a red bar on the diagonal. (A  $\beta$ -strand is denoted by a purple arrow in (B)).

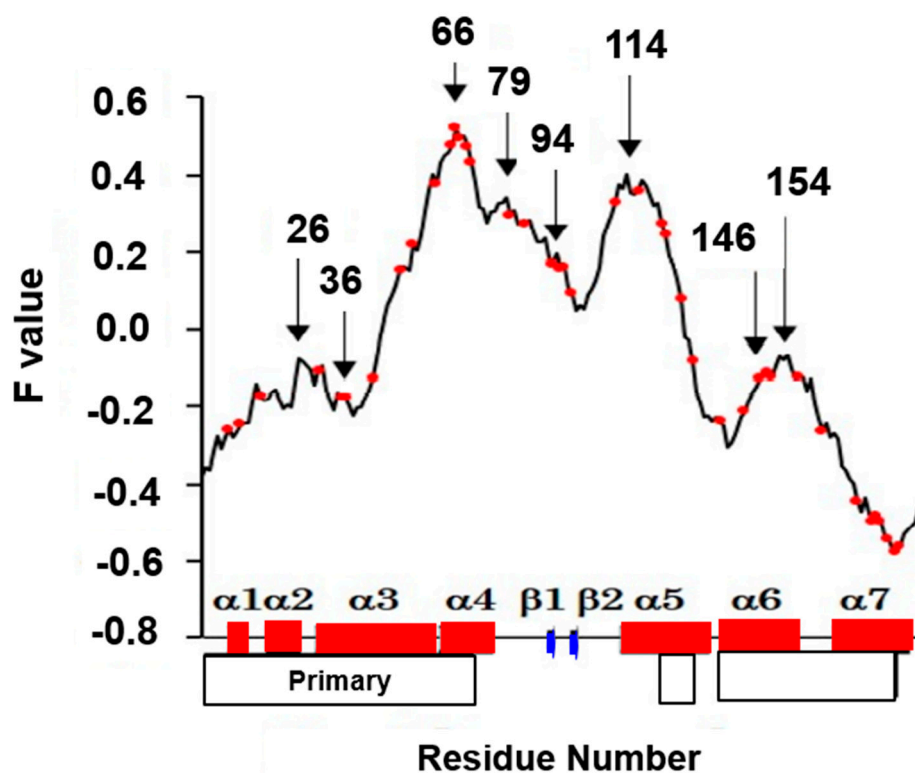

**Figure S2** The F-value plot for 153L. A red bar and a blue arrow along the abscissa of a plot indicate the  $\alpha$ -helix and  $\beta$ -strand, respectively. An open bar in the bottom of a figure represents a predicted region by ADM. "Primary" means the region with the highest  $\eta$ -value. A red dot indicates a CHR.

**(A)**

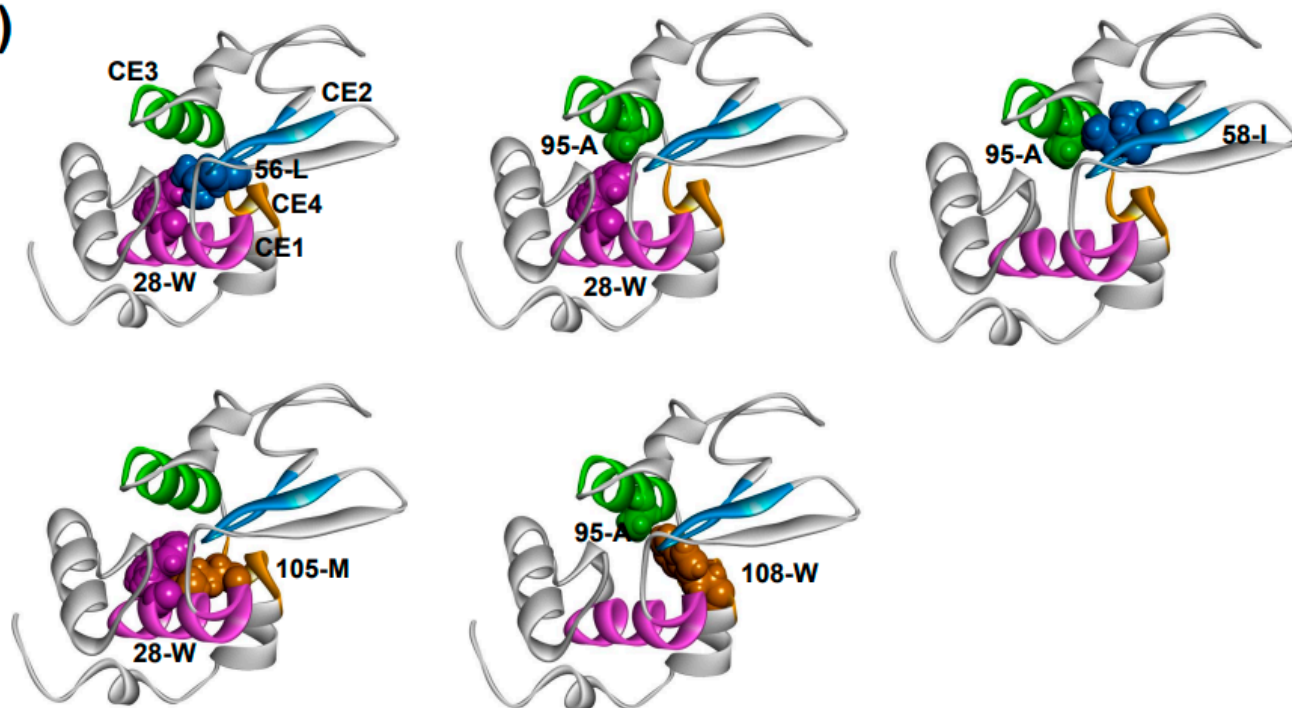

**(B)**

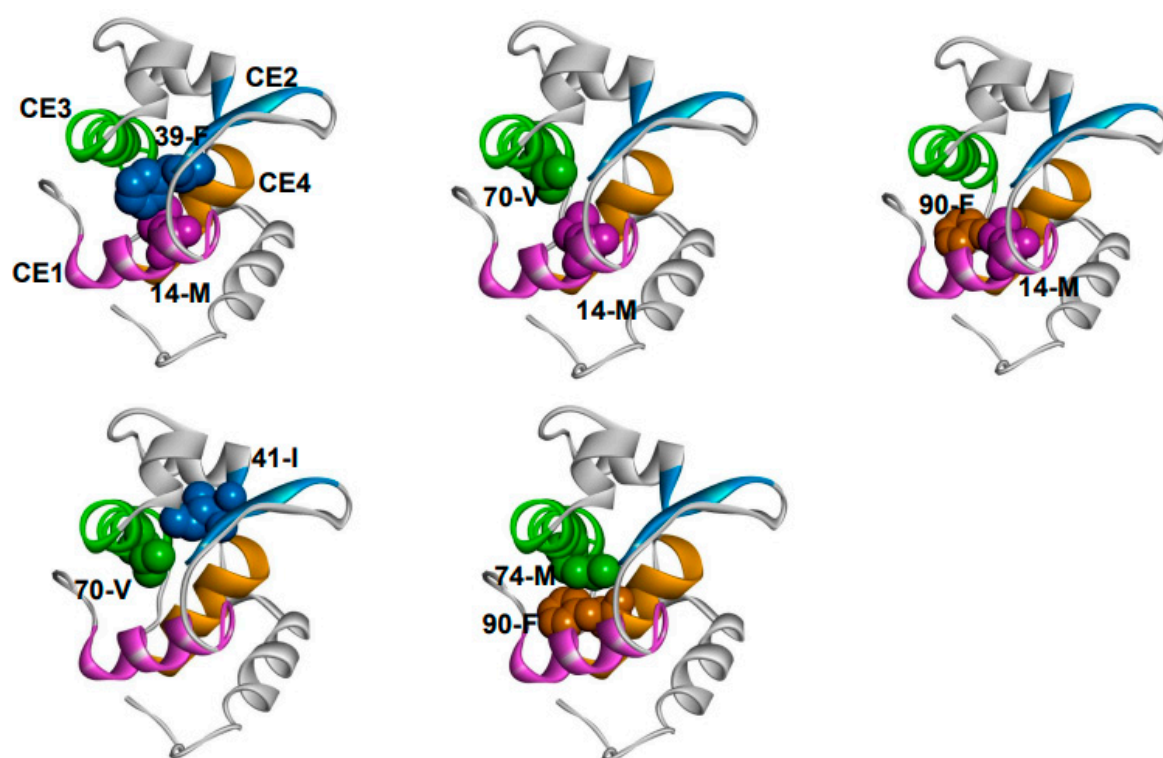

(C)

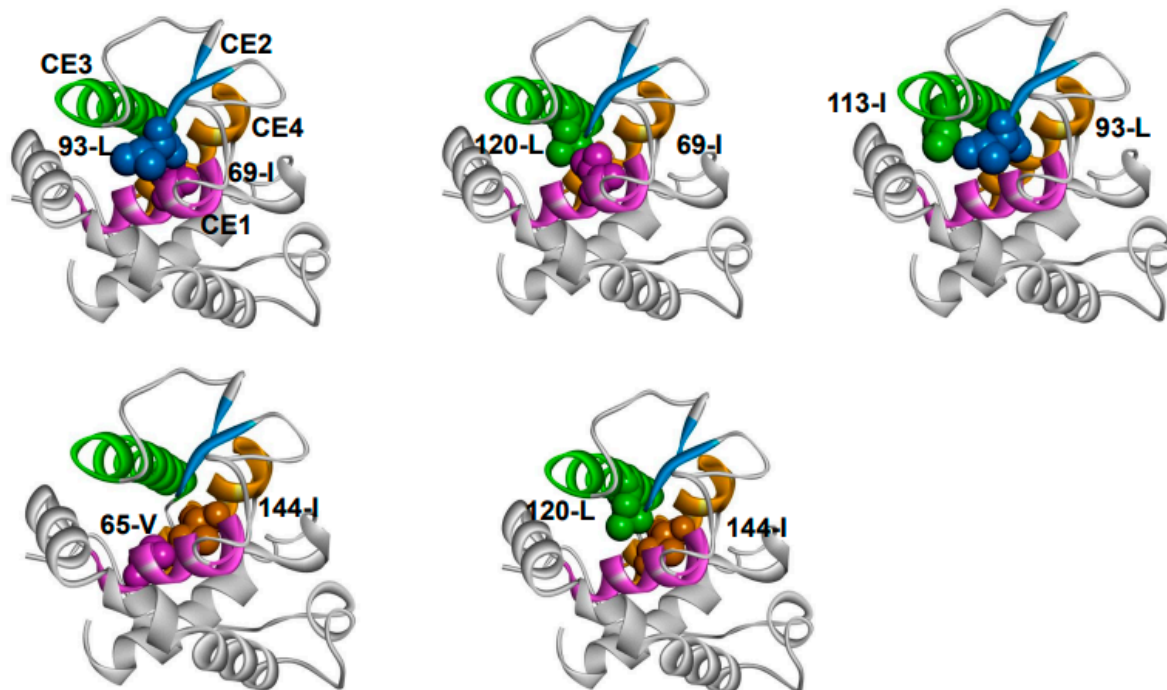

(D)

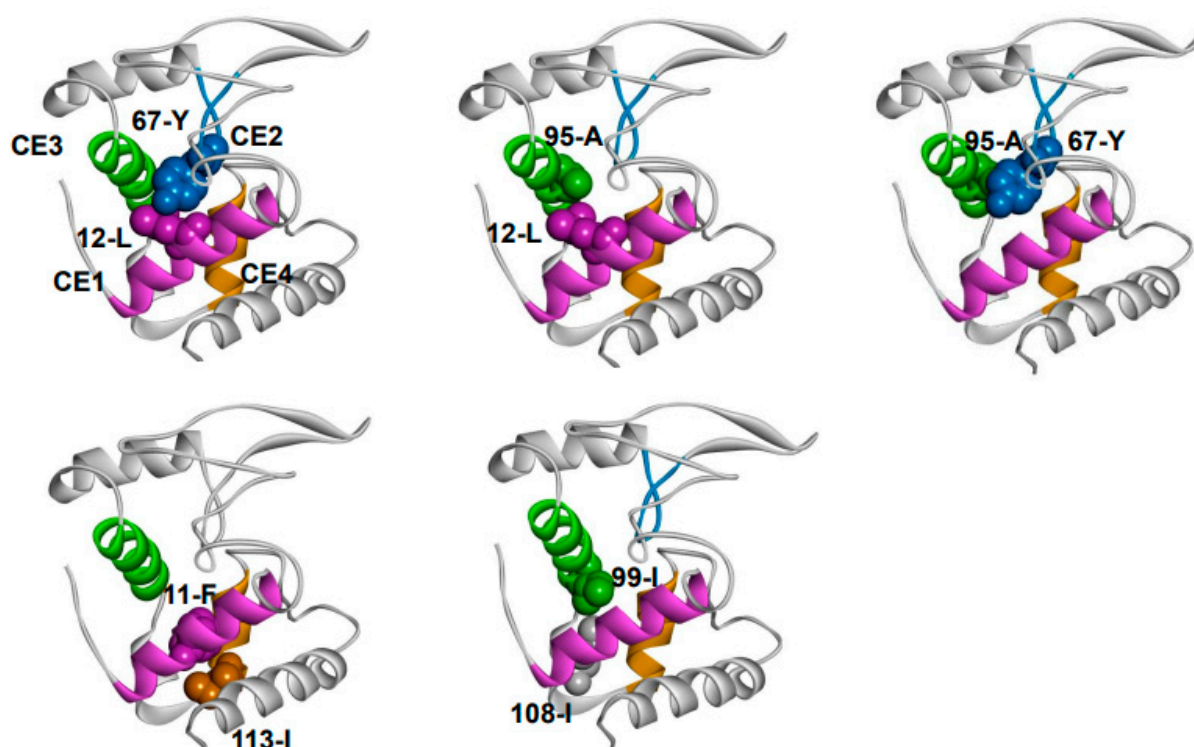

**Figure S3:** The hydrophobic contacts formed by CHRs in two common secondary structures observed in 2VB1 (A), 2DQA (B), 153L (C) and 1AM7 (D). A secondary structure with the same color denotes a structurally common element (labeled by CE1 (magenta), CE2(blue), CE3(green) and CE4(orange)) in all lysozymes.
